# Supplementary material for: Non-linear response of summertime marine productivity to increased meltwater discharge around Greenland
Source: PubMed Central journal article supplement (PMC6092443; doi:10.1038/s41467-018-05488-8), 2018-08-14
Supplement: 41467_2018_5488_MOESM1_ESM.pdf [file 41467_2018_5488_MOESM1_ESM.pdf]

**Non-linear response of summertime marine productivity to increased meltwater discharge  
around Greenland**

**Hopwood et al.**

**Supplementary material**

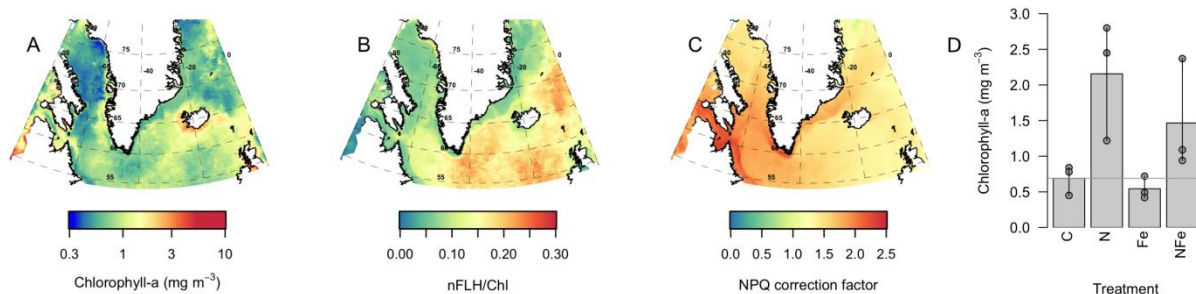

**Supplementary Figure 1** Derivation of satellite-derived chlorophyll-a fluorescence quantum yields and experimental testing for limiting nutrients in Fram Strait. **(A)** Average chlorophyll-a concentrations (June, July, August; JJA), **(B)** Average JJA normalised fluorescence line height (nFLH) / chlorophyll-a concentration, **(C)** Non-photochemical quenching (NPQ) correction factor for fluorescence quantum yields, resulting from variable incident irradiance at the instant of nFLH capture <sup>1</sup> **(D)** A bottle-scale nutrient addition experiment from Fram Strait demonstrating NO<sub>3</sub> limitation of phytoplankton, as indicated by enhanced chlorophyll-a biomass following 48 h incubation with N (with, or without, added Fe) conducted as per <sup>2</sup>. Bars represent mean chlorophyll-a responses (n=3 biological replicates), data points indicate responses for individual bottles, vertical lines indicate the range. C=Control, no added nutrients; N=1 μM NO<sub>3</sub> + 1 μM NH<sub>4</sub> addition; Fe=2 nM Fe addition; NFe=combined N and Fe addition.

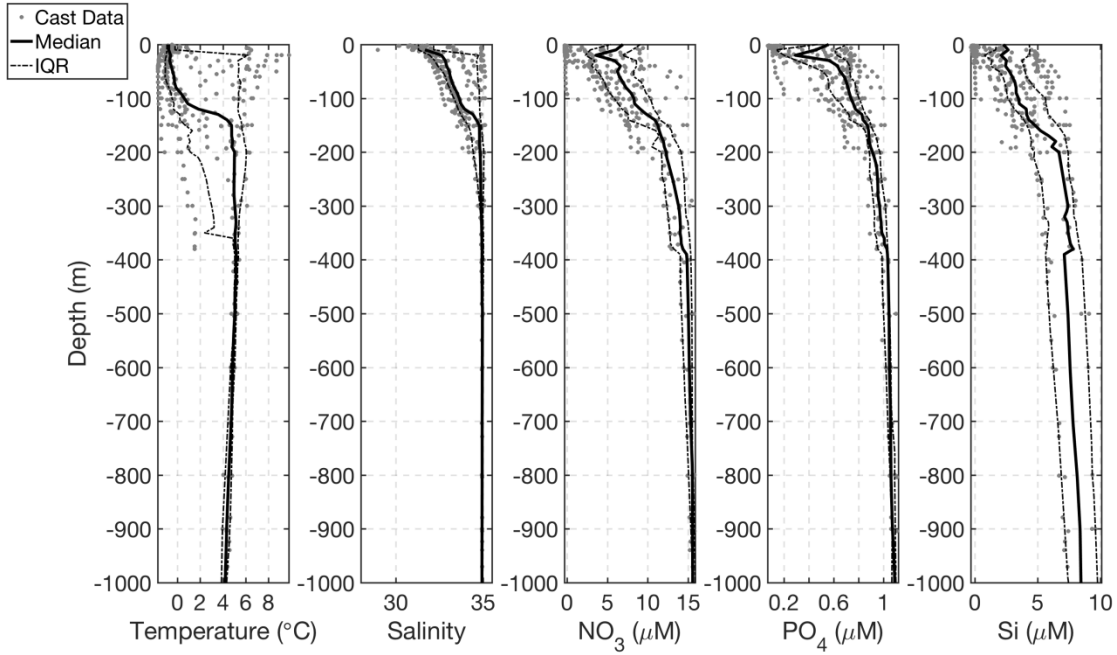

**Supplementary Figure 2** Summer (June-July-August) macronutrient profiles used as input for the subglacial discharge plume model. Nutrient concentrations (open circles, as per Table S2) with median (thick black lines) and lower/upper quartiles (black dashed lines) shown.

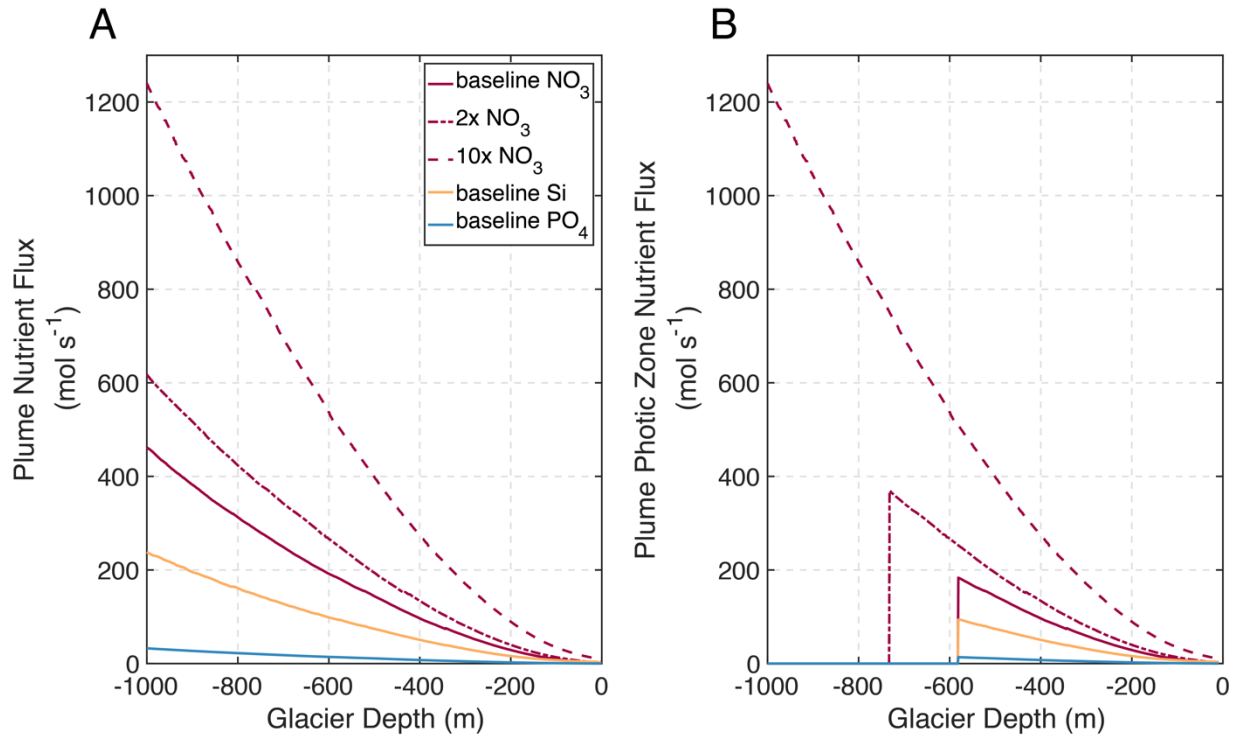

**Supplementary Figure 3** Subglacial discharge plume model output. A 500 m<sup>3</sup> s<sup>-1</sup> discharge scenario (continuous lines for NO<sub>3</sub>, PO<sub>4</sub> and Si) is plotted showing the plume macronutrient (NO<sub>3</sub>, Si, PO<sub>4</sub>) fluxes at the terminal depth (**A**) and into the photic zone (0-50 m) (**B**). Additional scenarios, with 2-fold (1000 m<sup>3</sup> s<sup>-1</sup>) and 10-fold (5000 m<sup>3</sup> s<sup>-1</sup>) higher subglacial discharge scenarios are also shown for NO<sub>3</sub> only (dashed lines). Note that for the 2× and 10× subglacial discharge scenarios, the resulting plume equilibrates within the photic zone at deeper glacier grounding line depths.

| Cruise/ship                      | Year/Season                | Nutrient data                                                                  | Stations                                        | Region                 | Project funding                     |
|----------------------------------|----------------------------|--------------------------------------------------------------------------------|-------------------------------------------------|------------------------|-------------------------------------|
| RRS James<br>Clark Ross<br>JR302 | June-July<br>2014          | Unpublished,<br>provided by<br>Sinhue Torres-<br>Valdes                        | 47-50, 52,<br>53, 63, 64,<br>77-82, 108,<br>109 | South<br>Greenland     | NERC<br>RAGNARoCC<br>(NE/K00249X/1) |
| RRS<br>Discovery<br>D354         | July-August<br>2010        | Unpublished,<br>provided by<br>Eric Achterberg                                 | 10-14                                           | Southeast<br>Greenland | NERC<br>IBIS<br>(NE/E006833/1)      |
| FS Polarstern<br>PS100, GN05     | July-<br>September<br>2016 | Unpublished,<br>provided by<br>Kai-Uwe<br>Ludwichowski<br>and Martin<br>Graeve | 18-20                                           | Northeast<br>Greenland | DFG, GRIFF                          |

**Supplementary Table 1** Data source of shelf macronutrient profiles taken around Greenland. Station names are as per the respective cruise reports.

| NO <sub>3</sub> /<br>μM | DFe /<br>nM | Fe* / nM | Latitude<br>(°N) | Longitude<br>(°E) |
|-------------------------|-------------|----------|------------------|-------------------|
| 0.87                    | 1.60        | 1.54     | 79.569           | -19.518           |
| 0.87                    | 1.36        | 1.30     | 79.569           | -19.518           |
| 0.06                    | 1.38        | 1.38     | 79.550           | -18.688           |
| 0.06                    | 4.12        | 4.11     | 79.550           | -18.688           |
| 0.06                    | 1.07        | 1.06     | 79.550           | -18.688           |
| 0.06                    | 2.13        | 2.13     | 80.149           | -17.381           |
| 0.06                    | 2.33        | 2.32     | 80.149           | -17.381           |
| 1.27                    | 1.15        | 1.06     | 79.196           | -17.105           |
| 0.30                    | 0.95        | 0.93     | 79.638           | -16.656           |
| 0.00                    | 1.00        | 1.00     | 77.867           | -14.801           |
| 0.00                    | 1.02        | 1.02     | 77.867           | -14.801           |
| 0.00                    | 0.84        | 0.84     | 77.867           | -14.801           |
| 0.00                    | 0.80        | 0.80     | 76.802           | -8.615            |
| 0.00                    | 0.70        | 0.70     | 76.802           | -8.615            |
| 0.00                    | 1.31        | 1.31     | 80.219           | -8.144            |
| 0.27                    | 1.67        | 1.65     | 78.678           | -7.948            |
| 0.27                    | 1.69        | 1.67     | 78.678           | -7.948            |
| 0.41                    | 1.77        | 1.74     | 79.589           | -4.772            |
| 0.57                    | 2.37        | 2.33     | 80.326           | -4.009            |
| 0.37                    | 0.48        | 0.45     | 78.804           | -3.510            |
| 0.03                    | 0.28        | 0.28     | 78.854           | -2.567            |
| 0.07                    | 0.39        | 0.39     | 78.822           | -2.042            |

**Supplementary Table 2** Surface NO<sub>3</sub> and dissolved Fe (DFe) concentrations determined on GEOTRACES section GN05 (used to calculate Fe\*, Fig 1).

| Glacier                   | Grounding line depth / m | Entrainment factor |
|---------------------------|--------------------------|--------------------|
| Upernavik                 | 100                      | 4.1                |
| Umiamako                  | 230                      | 19                 |
| Kangiata Nunata Sermia    | 250                      | 12                 |
| Kangerdlugssup Sermerssua | 250                      | 16                 |
| Heilprin                  | 350                      | 34                 |
| Store                     | 500                      | 26                 |
| Tracy                     | 610                      | 81                 |
| Helheim                   | 650                      | 34                 |
| Kangerdlugssuaq           | 650                      | 29                 |
| Jakobshavn Isbrae         | 800                      | 29                 |
| Alison                    | 850                      | 57                 |
| Rink Isbrae               | 850                      | 72                 |

**Supplementary Table3** Entrainment factors calculated at the plume terminal level for different glacier systems using data presented in Carroll et al.,<sup>3</sup>. Entrainment factors were weighted over the year by multiplying daily entrainment factors by the fraction of annual discharge occurring on each day.

### Supplementary References

1. Browning, T. J., Bouman, H. A. & Moore, C. M. Satellite-detected fluorescence: Decoupling nonphotochemical quenching from iron stress signals in the South Atlantic and Southern Ocean. *Global Biogeochem. Cycles* **28**, 510–524 (2014).
2. Ryan-Keogh, T. J. *et al.* Spatial and temporal development of phytoplankton iron stress in relation to bloom dynamics in the high-latitude North Atlantic Ocean. *Limnol. Oceanogr.* **58**, 533–545 (2013).
3. Carroll, D. *et al.* The impact of glacier geometry on meltwater plume structure and submarine melt in Greenland fjords. *Geophys. Res. Lett.* **43**, 9739–9748 (2016).
